# Supplementary material
Source: PubMed Central journal article supplement (PMC6601609)
Supplement: NIHMS1029740-supplement-Suppl_Data.pdf [file NIHMS1029740-supplement-Suppl_Data.pdf]

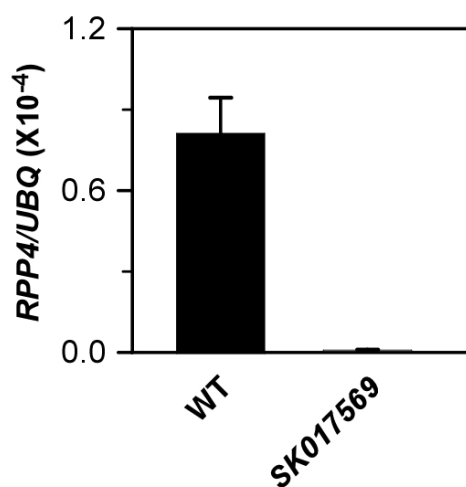

**Supplementary Figure 1. The expression level of *RPP4* (At4g16860) is diminished in the *rpp4* mutant (SK017569).**

The mRNA was extracted to analyze the expression level of *RPP4* using quantitative PCR (qPCR). Gene expression was normalized against constitutively expressed *UBQ5*. Error bars represent SD (n = 3). WT, wild-type.

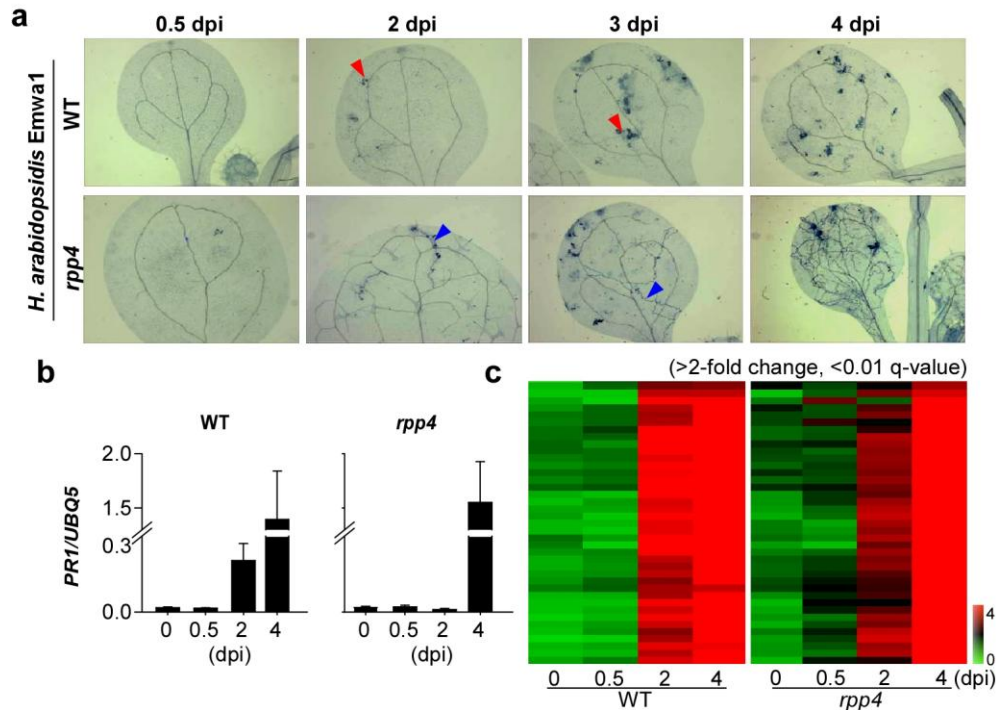

**Supplementary Figure 2. Identification of RPP4-regulated genes through expression profiling.**

**a**, *In planta* growth of *Hpa* Emwa1 and plant responses were examined under a microscope following lactophenol trypan blue (LTB) staining. Red arrows indicate HR cell death and blue arrows point at hyphae. dpi, days post inoculation. **b**, Expression levels of the marker gene *PR1* were measured using qPCR and normalized with *UBQ5*. Error bars represent SD ( $n = 3$  biological replicates). **c**, Expression profiles of candidate genes that were significantly induced (q-values < 0.01) more than 2-fold in WT at 2 dpi.

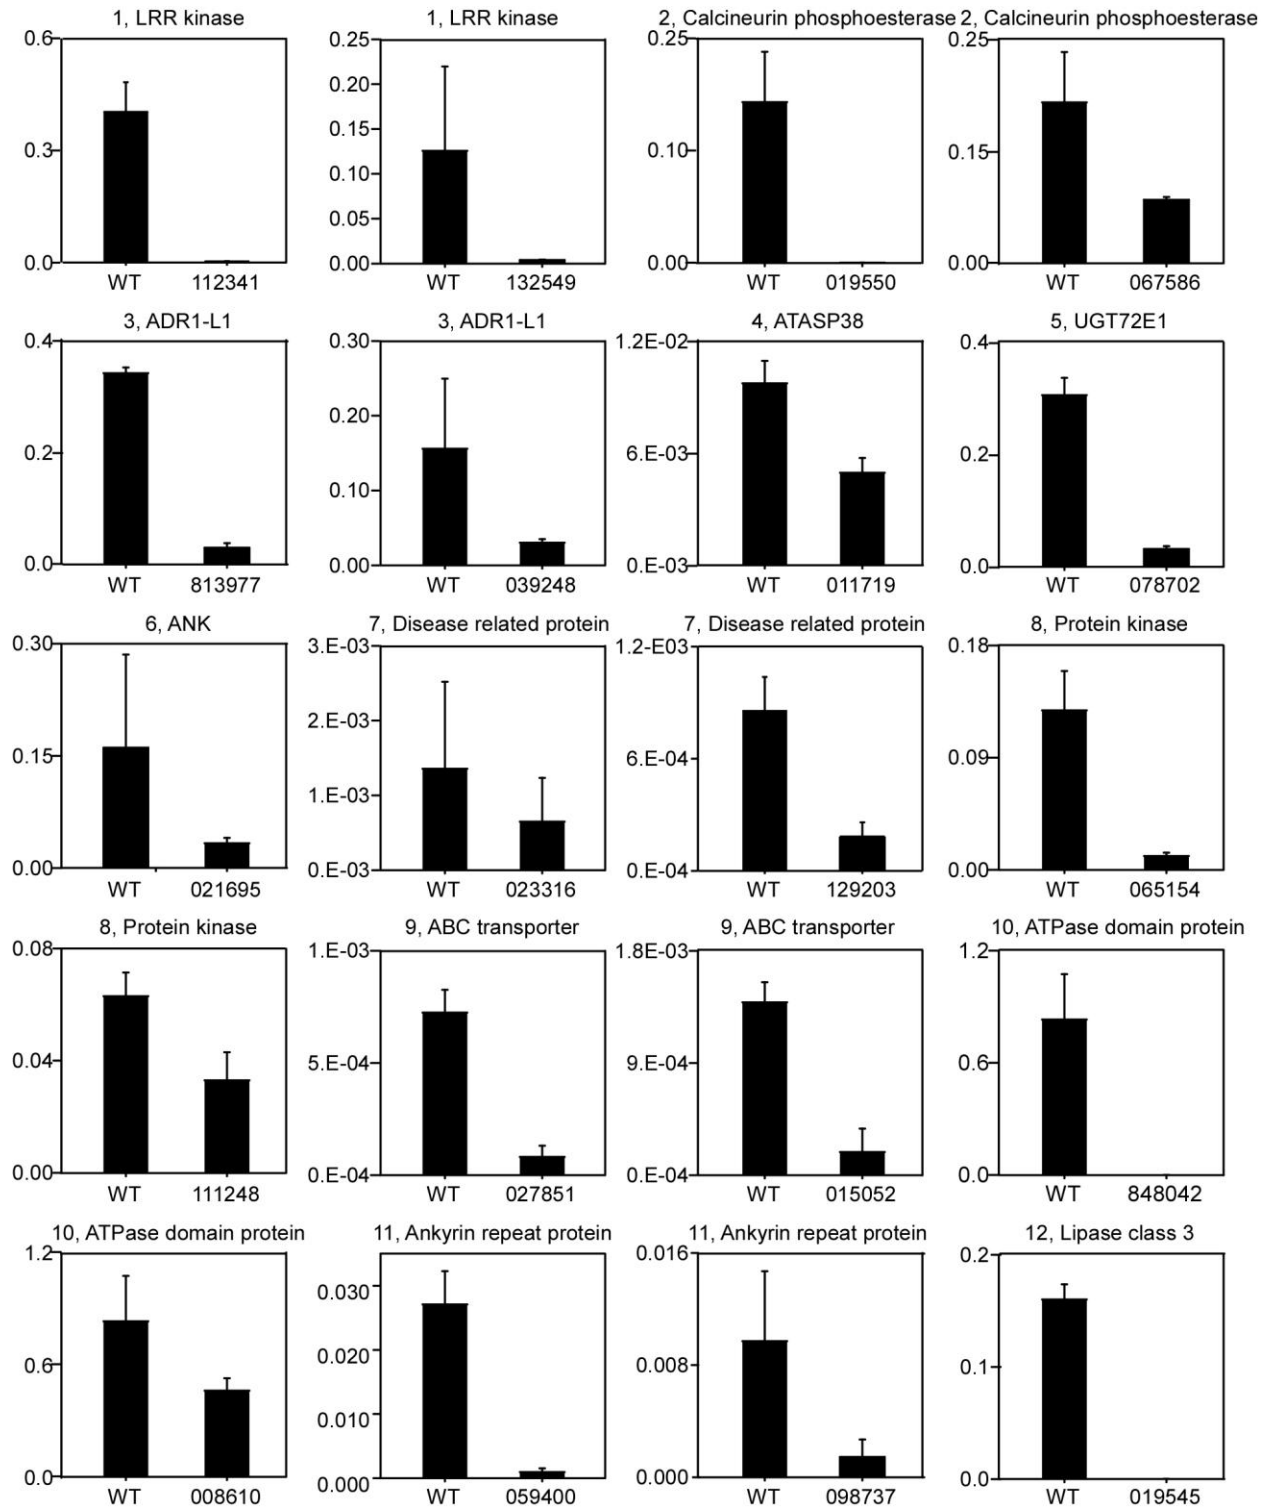

**Supplementary Figure 3-1. T-DNA insertion diminished the expression of candidate genes as measured by qPCR.**

Gene expression levels were normalized against *UBQ5*. Error bars represent SD (n = 3 biological replicates). Full numbers for the T-DNA insertion mutant lines are shown in Supplementary Table 1. Primers used in this analysis are shown in Supplementary Table 2.

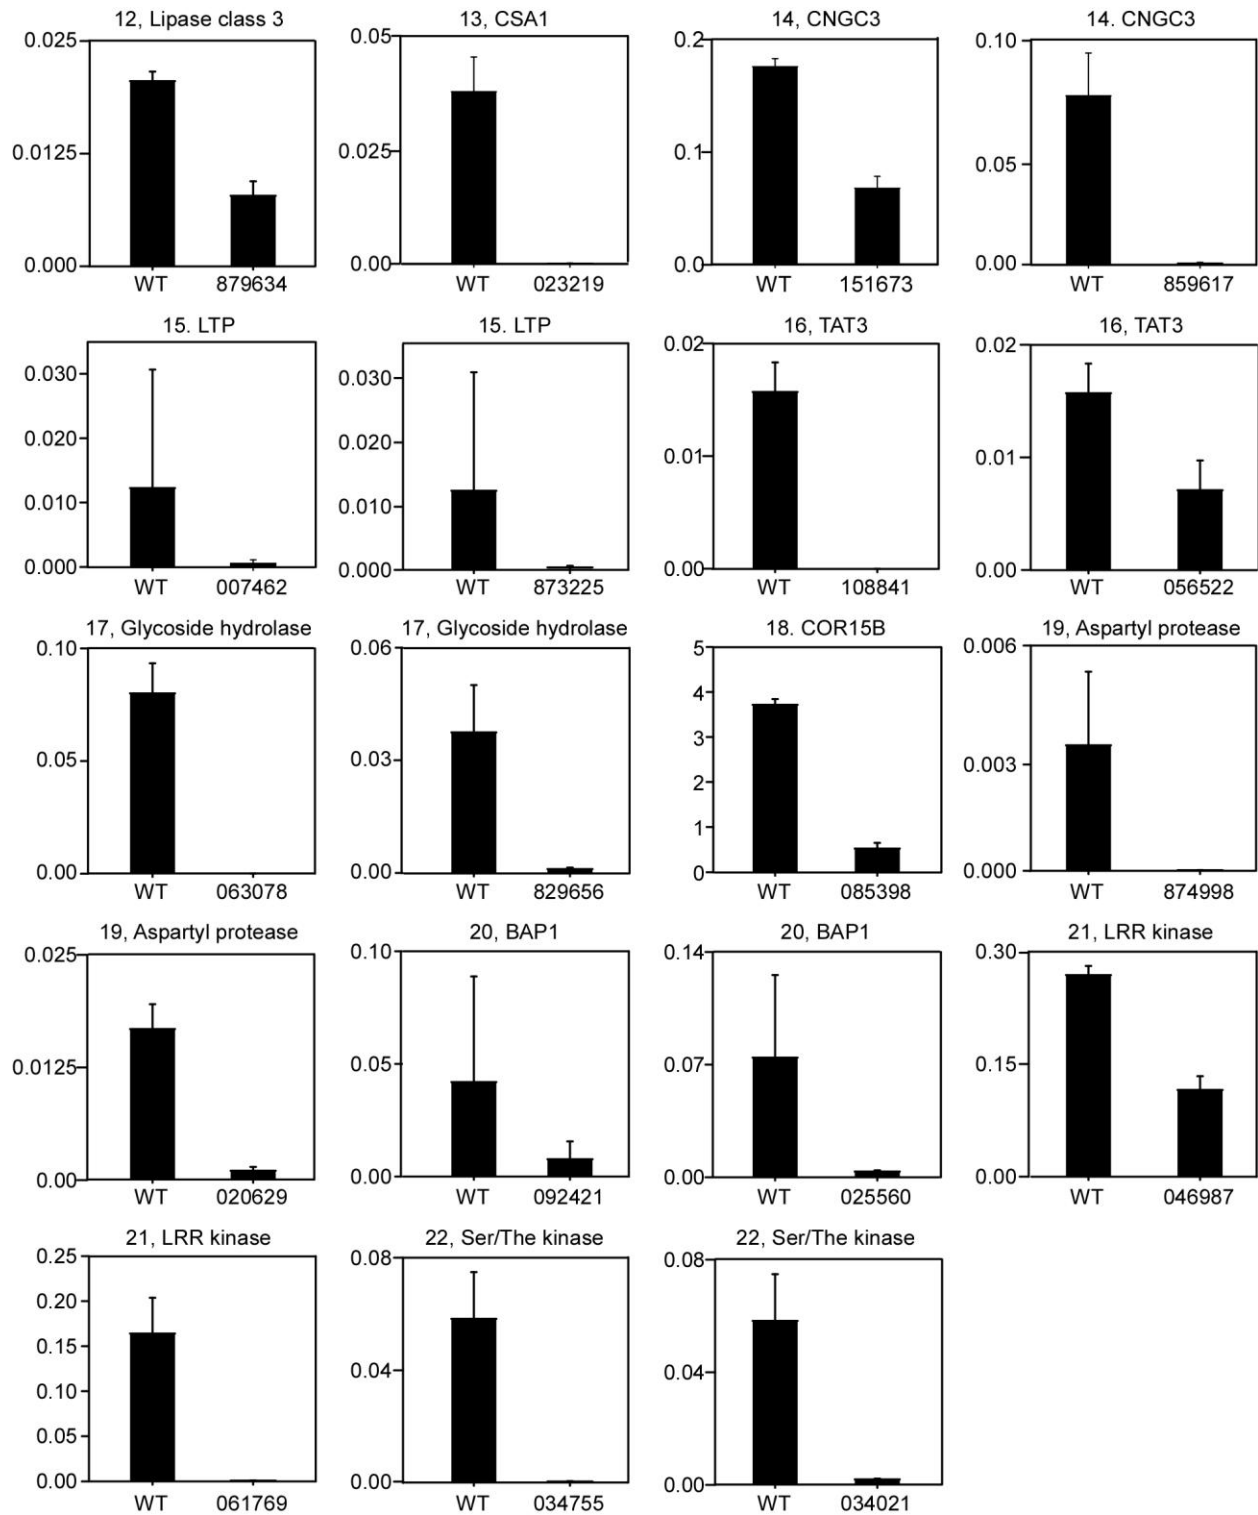

**Supplementary Figure 3-2. T-DNA insertion diminished the expression of candidate genes as measured by qPCR.**

Gene expression levels were normalized against *UBQ5*. Error bars represent SD (n = 3 biological replicates). Full numbers for the T-DNA insertion mutant lines are shown in Supplementary Table 1. Primers used in this analysis are shown in Supplementary Table 2.

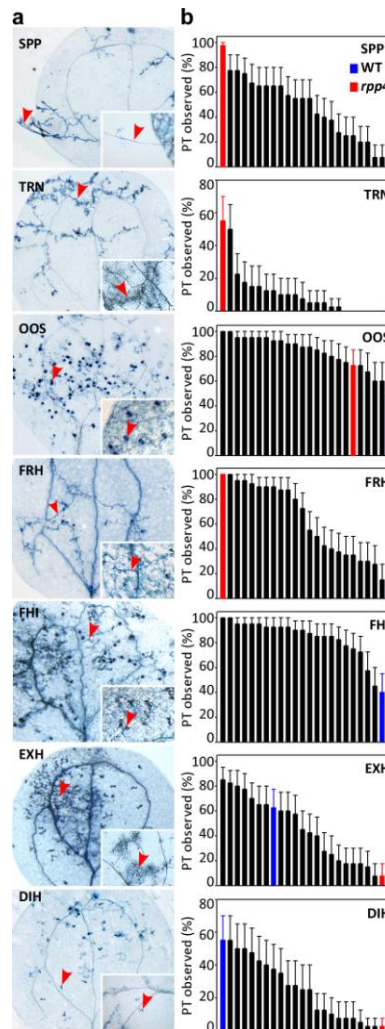

**Supplementary Figure 4. Characterization of mutants in RPP4-mediated resistance against *Hpa* Emwa1.**

**a**, The seven phenotypes scored in WT, *rpp4*, and 22 mutants 7 dpi with *Hpa* Emwa1. SPP, Sporangiphore; TRN, Trailing necrosis; OOS, Oospore; FRH, Free hypha; FHI, Free hyphal intermediate; EXH, Expanding HR; DIH, Discrete HR. **b**, Bar graphs showing distributions of phenotype (PT) scores (% of occurrence in 40 leaves/genotype) of the mutants (black bars) compared with WT (blue bar) and *rpp4* (red bar). Mutants are ranked from the highest to the lowest with no correspondence from panel to panel. The error bars, 95% confidence intervals based on binomial distribution.

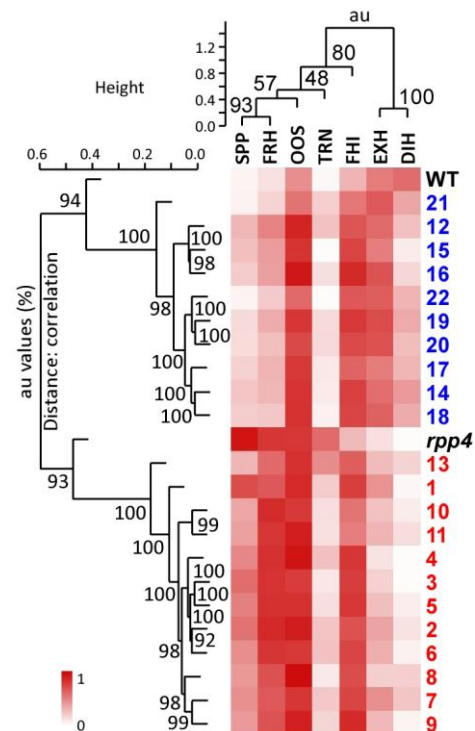

**Supplementary Figure 5. Phenotypic clustering analysis using data from 3 biological replicates.**

Hierarchical clustering performed using the mean phenotype scores of the three biological replicates with bootstrap (100,000 times) showed that mutants were divided into 2 groups similar to Fig. 1b (Mutants were coloured according to Fig. 1b). Distance was measured by the standard correlation coefficient (average linkage; scale 0-1).



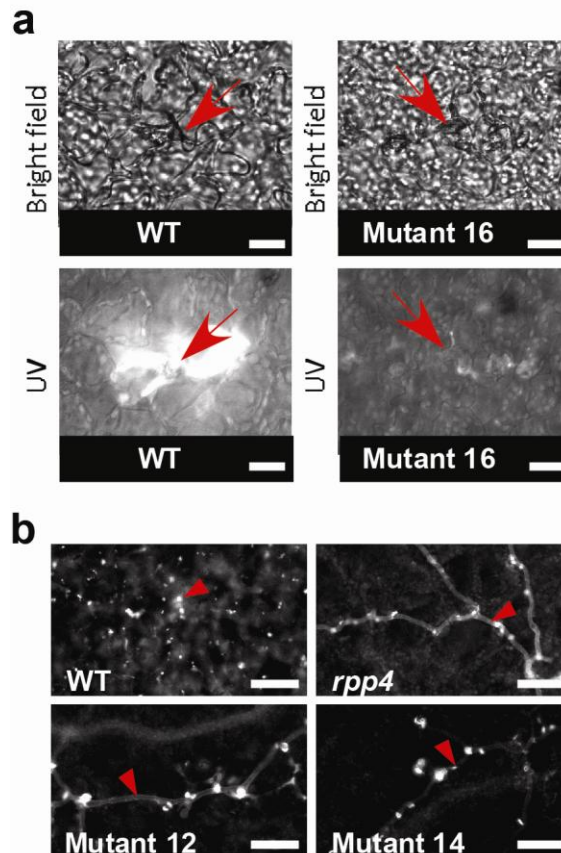

**Supplementary Figure 6. Defects in *R* gene-mediated resistance in Group 2 mutants.**

**a**, Phenolic compound accumulation at 7 dpi with *Hpa* Emwa1. Arrows point at sites of spore penetration. **b**, Callose deposition 7 dpi with *Hpa* Emwa1. Red arrows indicate callose produced by plants (WT) and along the hyphae of the pathogen (mutants).

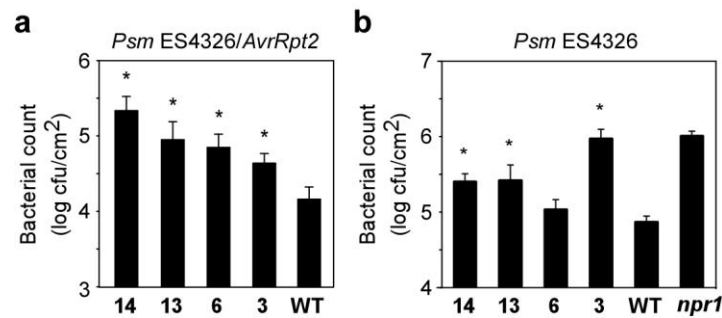

**Supplementary Figure 7. Some of the mutants compromised in RPP4-mediated resistance against *Hpa* Emwa1 are also defective in immune responses against *Pseudomonas*.**

**a**, Mutants 2, 6, 8 and 12 are compromised in RPS2-mediated resistance against *Psm* ES4326/*AvrRpt2*. Error bars represent 95% confidence interval (n = 8). cfu, colony-forming unit.

This experiment was performed three times with similar results. Asterisks indicate p-values <

0.01. **b**, Mutants 2, 8, and 12 showed enhanced susceptibility to *Psm* ES4326.

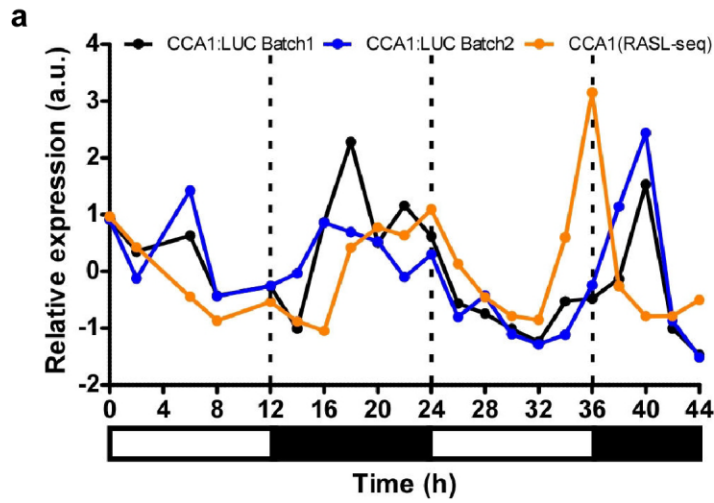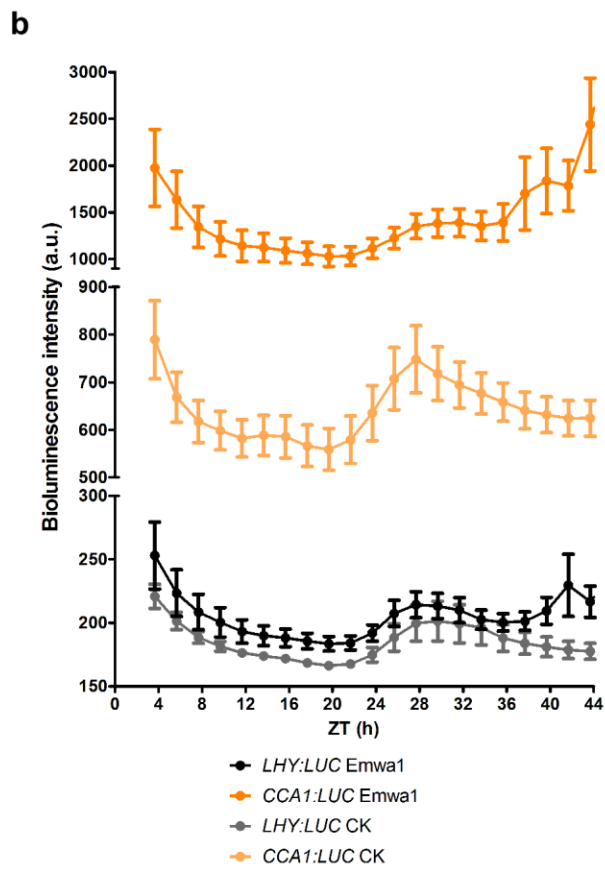

**Supplementary Figure 8. Luciferase-based diurnal and free running tests.**

**a**, Luciferase measurement of *CCA1:LUC* under the conditions used for the RASL-seq experiment (Fig. 3c, Col CK). Two biological replicates were included. The white bars, the day; black bar, the night. **b**, Free running test of *CCA1:LUC* and *LHY:LUC* expression with/without *Hpa* Emwa1 treatment. CK, control; Emwa1, *Hpa* Emwa1 treated; ZT, zeitgeber time. Error bars represent SEM (n=18). This experiment has been repeated three times with similar results.

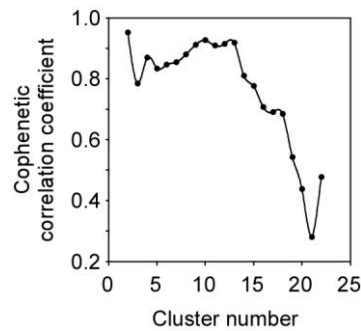

**Supplementary Figure 9. Determination of the cluster number used in nonnegative matrix factorization (NMF).**

A range of cluster numbers from 2 to 22 were implemented in NMF with 300 runs (10,000 iterations/run) and the corresponding cophenetic correlation coefficients were calculated. When cluster number equalled 2, the highest cophenetic correlation coefficient was achieved.

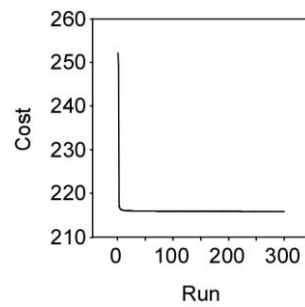

### Supplementary Figure 10. Convergence of NMF.

300 runs (10,000 iterations/run) were performed using 2 clusters and the corresponding costs were calculated for each run. The NMF algorithm converged with fewer than 50 runs.

**a**

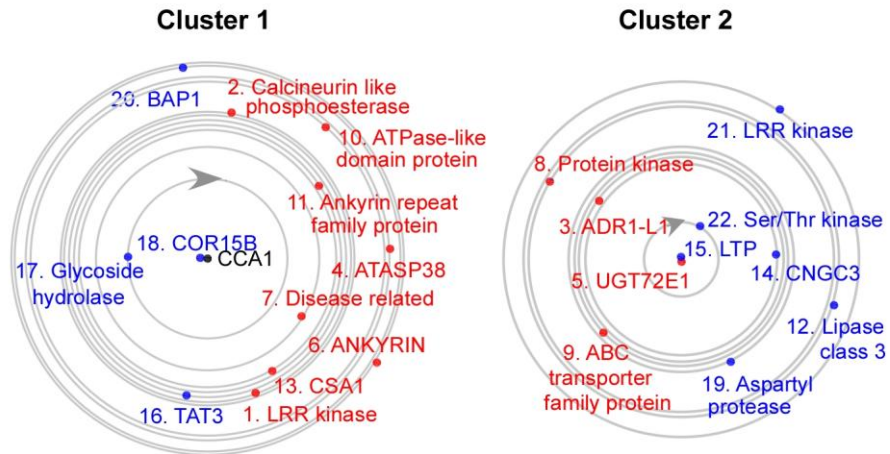

**b**

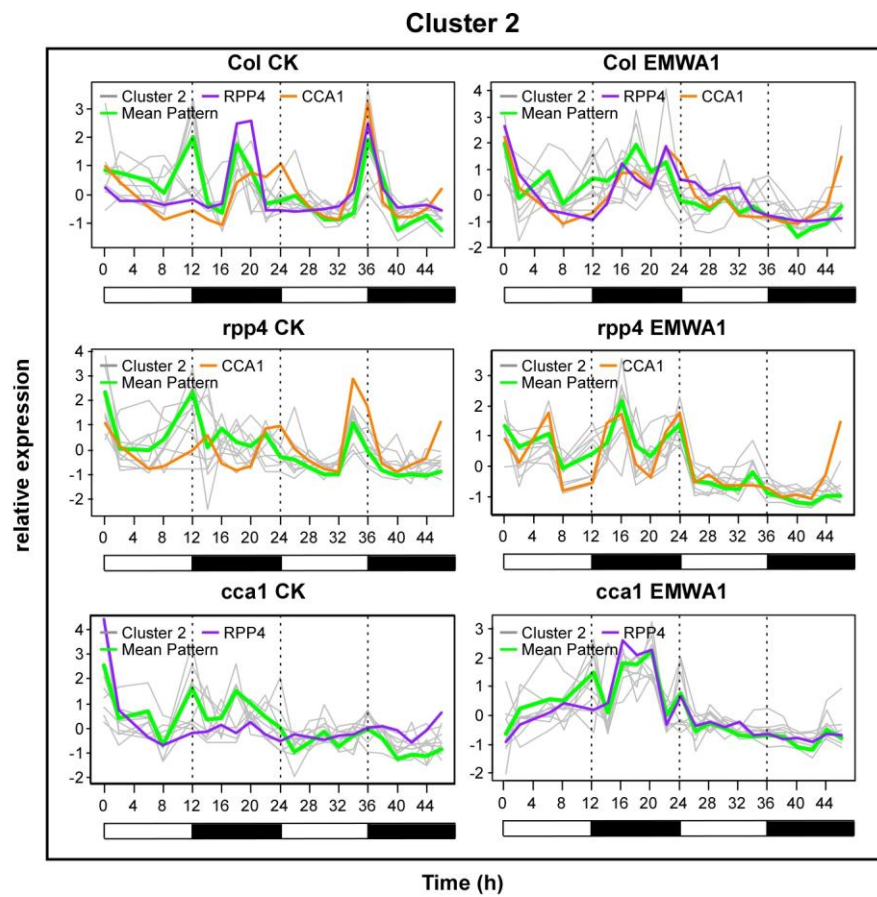

**Supplementary Figure 11. Membership distance for Cluster 1 and Cluster 2 genes determined by their expression patterns.**

**a**, The two expression clusters overlap with the phenotypic grouping (as in Fig. 1b; Group 1 genes in red and Group 2 in blue). For each gene, its membership distance in the expression cluster is represented by the radius of the circle. The calculation is detailed in Methods. **b**, Time-course expression of the NMF Cluster 2 genes with/without *Hpa* Emwa1 infection. The white bars, the day; black bar, the night. CK, control; EMWA1, *Hpa* Emwa1 inoculated.



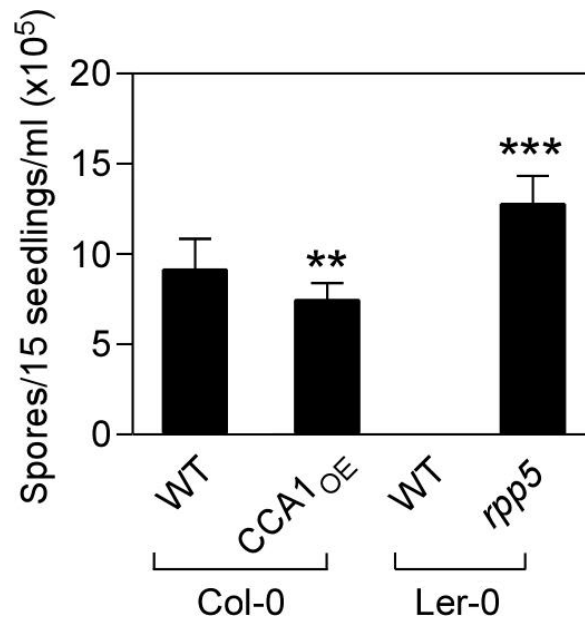

**Supplementary Figure 12. Enhanced disease resistance to *Hpa* Noco2 observed in the CCA1<sub>OE</sub> transgenic line based on sporangiospore count 7 dpi.**

Error bars, SD (n = 3, One-way ANOVA and Bonferroni's Multiple Comparison Test); \*\*, p-values < 0.01, \*\*\* p-values < 0.001. This experiment has been repeated twice with similar results.

| #   | AGI       | Description                           | Mutant lines | Insertion | <i>Hpa*</i> |         |          |       |       |       | <i>P. syringae</i> ES4326 |     | elf18 |         |       |
|-----|-----------|---------------------------------------|--------------|-----------|-------------|---------|----------|-------|-------|-------|---------------------------|-----|-------|---------|-------|
|     |           |                                       |              |           | Enw1        |         |          | Hiks1 | Cala2 | Noco2 | AvrPpa2                   | Vir |       | Callose | FW/RL |
|     |           |                                       |              |           | Infection   | Callose | Phenolic |       |       |       |                           |     |       |         |       |
| 1   | AT1G35710 |                                       | SK112341     | 300-UTR5  | S           | +/-     | NT       | R     | R     | EDS   | R                         | NT  | +     | Ins     |       |
| 1A  |           | LRR-kinase                            | SK132549     | 300-UTR5  | S           | NT      | NT       | R     | R     | EDS   | R                         | NT  | +     | Ins     |       |
| 2   | AT1G13750 |                                       | SK019550     | Exon      | S           | +/-     | NT       | R     | R     | EDS   | R                         | NT  | +     |         |       |
| 2A  |           | Calcineurin-like phosphoesterase      | SK067586     | Exon      | S           | NT      | NT       | R     | R     | EDS   | R                         | NT  | +     |         |       |
| 3   | AT4G33300 |                                       | CS813977     | Exon      | S           | +/-     | NT       | R     | R     | EDS   | S                         | EDS | +     |         |       |
| 3A  |           | ADR1-like 1 (ADR1-L1)                 | SK039248     | 300-UTR5  | S           | NT      | NT       | R     | R     | EDS   | S                         | EDS | +     |         |       |
| 4   | AT5G02190 |                                       | SK011719     | 300-UTR3  | S           | +/-     | NT       | R     | R     | EDS   | R                         | NT  | +     |         |       |
| 5   | AT5G50740 |                                       | SK078702     | Exon      | S           | +/-     | NT       | R     | R     | EDS   | R                         | NT  | +     |         |       |
| 6   | AT5G54610 |                                       | SK021695     | 300-UTR3  | S           | +/-     | NT       | R     | R     | EDS   | S                         | EDS | +     |         |       |
| 7   | AT5G45440 |                                       | SK023316     | Exon      | S           | +/-     | NT       | R     | R     | EDS   | R                         | NT  | +     |         |       |
| 7A  |           | Disease resistance protein-related    | SK129203     | 300-UTR5  | S           | NT      | NT       | R     | R     | EDS   | R                         | NT  | +     |         |       |
| 8   | AT1G16260 |                                       | SK065154     | 300-UTR5  | S           | +/-     | +        | R     | R     | EDS   | R                         | NT  | +     |         |       |
| 8A  |           | Protein kinase family protein         | SK111248     | 300-UTR3  | S           | NT      | NT       | R     | R     | EDS   | R                         | NT  | +     |         |       |
| 9   | AT5G52860 |                                       | SK027851     | 300-UTR3  | S           | +/-     | NT       | R     | R     | EDS   | R                         | NT  | +     |         |       |
| 9A  |           | ABC transporter family protein        | SK015052     | 300-UTR3  | S           | NT      | NT       | R     | R     | EDS   | R                         | NT  | +     |         |       |
| 10  | AT4G36290 |                                       | CS848042     | Intron    | S           | +/-     | NT       | R     | R     | EDS   | R                         | NT  | +     |         |       |
| 10A |           | ATPase-like domain containing protein | SK008610     | 300-UTR5  | S           | +/-     | NT       | R     | R     | EDS   | R                         | NT  | +     |         |       |
| 11  | AT1G10340 |                                       | SK059400     | Exon      | S           | +       | NT       | R     | R     | EDS   | R                         | NT  | +     |         |       |
| 11A |           | Ankyrin repeat family protein         | SK098737     | 300-UTR5  | S           | NT      | NT       | R     | R     | EDS   | R                         | NT  | +     |         |       |
| 12  | AT3G48080 |                                       | SK019545     | Exon      | S           | -       | NT       | R     | R     | EDS   | R                         | NT  | +     |         |       |
| 12A |           | Lipase class 3 family protein         | CS879634     | Exon      | S           | -       | +        | R     | R     | EDS   | R                         | NT  | +     |         |       |
| 13  | AT5G17880 |                                       | SK023219     | Exon      | S           | +/-     | NT       | R     | R     | EDS   | S                         | EDS | +     |         |       |
|     |           | Constitutive shade-avoidance 1 (CSA1) |              |           |             |         |          |       |       |       |                           |     |       |         |       |

|     |           |                                           |          |          |     |     |    |   |     |     |     |     |    |
|-----|-----------|-------------------------------------------|----------|----------|-----|-----|----|---|-----|-----|-----|-----|----|
| 13  | AT5G17880 | Constitutive shade-avoidance 1 (CSA1)     | SK023219 | Exon     | S   | +/- | NT | R | R   | EDS | S   | EDS | +  |
| 14  | AT2G46430 | Cyclic nucleotide gated channel 3 (CNGC3) | SK151673 | Exon     | S   | -   | +  | R | R   | EDS | S   | EDS | +  |
| 14A | CS859617  |                                           | Exon     | S        | NT  | NT  | R  | R | EDS | S   | EDS | +   |    |
| 15  | AT3G22600 | Lipid transfer protein family (LTP)       | SK007462 | 300-UTR5 | S   | +/- | +  | R | R   | EDS | R   | NT  | +  |
| 15A | CS873225  |                                           | Intron   | S        | NT  | NT  | R  | R | EDS | R   | EDS | R   | NT |
| 16  | AT2G24850 | Tyrosine aminotransferase (TAT3)          | SK108841 | Exon     | S   | +/- | -  | R | R   | EDS | R   | NT  | +  |
| 16A | SK056522  |                                           | Intron   | S        | NT  | NT  | R  | R | EDS | R   | EDS | R   | NT |
| 17  | AT3G54440 | Glycoside hydrolase                       | SK063078 | Exon     | S   | NT  | +  | R | R   | S   | R   | NT  | +  |
| 17A | CS829656  |                                           | Exon     | S        | NT  | NT  | R  | R | S   | R   | S   | R   | NT |
| 18  | AT2G42530 | Cold-responsive protein (COR15B)          | SK085398 | 300-UTR3 | S   | +/- | +  | R | R   | EDS | R   | NT  | +  |
| 19  | AT3G51330 | Aspartyl protease family protein          | CS874998 | Intron   | S   | NT  | NT | R | R   | S   | R   | NT  | +  |
| 19A | SK020629  |                                           | Exon     | S        | +/- | +   | R  | R | S   | R   | S   | R   | NT |
| 20  | AT3G61190 | BON association protein 1 (BAP1)          | SK092421 | Exon     | S   | +/- | +  | R | R   | EDS | R   | NT  | +  |
| 20A | SK025560  |                                           | Exon     | S        | NT  | NT  | R  | R | EDS | R   | EDS | R   | NT |
| 21  | AT4G08850 | LRR-kinase                                | SK046987 | Exon     | S   | +   | +  | R | R   | S   | R   | NT  | +  |
| 21A | SK061769  |                                           | Exon     | S        | NT  | NT  | R  | R | S   | R   | S   | R   | NT |
| 22  | AT1G66880 | Ser/Thr protein kinase family protein     | SK034755 | Exon     | S   | NT  | NT | R | R   | S   | R   | NT  | +  |
| 22A | SK034021  |                                           | Exon     | S        | +/- | +   | R  | R | S   | R   | S   | R   | NT |
|     | AT4G16860 | RPP4                                      | SK017569 | Intron   | S   | -   | -  | R | R   | S   | R   | S   | +  |
|     | WT        | WT                                        | Col-0    |          | R   | +   | +  | R | R   | S   | R   | S   | +  |

**Supplementary Table 1. A list of all mutant alleles and their phenotypes.**

SK, Salk line; CS, Sail line; S, susceptible; R, resistant; +, WT level of callose or phenolic deposition observed; +/-, lower than WT level of callose observed. NT, not tested; EDS, enhanced disease symptoms; Ins, insensitive. Vir, virulent; MAMP, microbial-associated molecular pattern; FW/RT, fresh weight assay and root length assay. Note (\*) that the infection phenotype against *Hpa* Emwa1 was determined based on microscopic observations of the symptoms; not all alleles were quantitatively measured as in Fig. 1a.

| #  | Description                             | Mutant   |                     | Sequence              |
|----|-----------------------------------------|----------|---------------------|-----------------------|
| 1  | LRR-kinase                              | SK112341 | F                   | GGCTCACGCTTTATCG      |
|    |                                         |          | R                   | TGTCCCGTGTTCTA        |
|    |                                         | SK132549 | F                   | GGCTCACGCTTTATCG      |
|    |                                         |          | R                   | TGTCCCGTGTTCTA        |
| 2  | Calcineurin-like phosphoesterase        | SK019550 | F                   | CCCAACTCAGGATCGT      |
|    |                                         |          | R                   | ACGGTGAGCGAGGAATA     |
|    |                                         | SK067586 | F                   | CCCAACTCAGGATCGT      |
|    |                                         |          | R                   | ACGGTGAGCGAGGAATA     |
| 3  | ADRI-like 1 (ADRI-L1)                   | CS813977 | F                   | TCTCGTGGCACTACCT      |
|    |                                         |          | R                   | CAACGTCGGTATCGCA      |
|    |                                         | SK039248 | F                   | TCTCGTGGCACTACCT      |
|    |                                         |          | R                   | CAACGTCGGTATCGCA      |
| 4  | Aspartic protease 38 (ATASP38)          | SK011719 | F                   | GTACTCAGTTTACTTTCCTGC |
|    |                                         | R        | GTTCGCTGATGATGATGTC |                       |
| 5  | UDP-glucosyl transferase 72E1 (UGT72E1) | SK078702 | F                   | TGCAGTGCATATTTATCCG   |
|    |                                         | R        | GCCCTCGTAATCACTCC   |                       |
| 6  | Ankyrin (ANK)                           | SK021695 | F                   | AGGTGACGTAGACCTT      |
|    |                                         | R        | AAAACCGTGTGCCTC     |                       |
| 7  | Disease resistance protein-related      | SK023316 | F                   | ATTGTGTTGATGATGTCC    |
|    |                                         |          | R                   | AGCCAACAGTCTAGCA      |
|    |                                         | SK129203 | F                   | ACGAATGGCTAGGGAC      |
|    |                                         |          | R                   | CACCGTATTCTCCGACA     |
| 8  | Protein kinase family protein           | SK065154 | F                   | CAGAACATCGCCCTAC      |
|    |                                         |          | R                   | GTGAGGCATTAGTGGTTT    |
|    |                                         | SK111248 | F                   | CAGAACATCGCCCTAC      |
|    |                                         |          | R                   | GTGAGGCATTAGTGGTTT    |
| 9  | ABC transporter family protein          | SK015052 | F                   | TGCCCAAATTACATTACG    |
|    |                                         |          | R                   | TGGAGGCTAAGCACGA      |
|    |                                         | SK027851 | F                   | CCGATGCTACTGCTCT      |
|    |                                         |          | R                   | GGCGAACATACCGAAT      |
| 10 | ATPase-like domain-containing protein   | CS848042 | F                   | TTCGTACCGCTATCGAC     |
|    |                                         |          | R                   | CTCCATAACACCATTGC     |
|    |                                         | SK008610 | F                   | TTCGTACCGCTATCGAC     |
|    |                                         |          | R                   | CTCCATAACACCATTGC     |
| 11 | Ankyrin repeat family protein           | SK059400 | F                   | TTGGGAATTAACAGCC      |
|    |                                         | R        | GCAACCGTATTACCTC    |                       |

|    |                                           |          |   |                       |
|----|-------------------------------------------|----------|---|-----------------------|
|    |                                           | SK098737 | F | GCACTGTTACGTCCT       |
|    |                                           |          | R | AGTACGGTCAACGCTC      |
| 12 | Lipase class 3 family protein             | SK019545 | F | ACTCAATAGGCTCCGC      |
|    |                                           |          | R | CTCTGCTCCCCTCGAA      |
|    |                                           | CS879634 | F | ACTCAATAGGCTCCGC      |
|    |                                           |          | R | CTCTGCTCCCCTCGAA      |
| 13 | Constitutive shade-avoidance 1 (CSA1)     | SK023219 | F | AACTGTAAAAGTCATGCC    |
|    |                                           |          | R | CATTCTTGGGGATGGAAC    |
| 14 | Cyclic nucleotide gated channel 3 (CNGC3) | SK151673 | F | AGGACATTAAACGCCATC    |
|    |                                           |          | R | ATAGGGAATTGGGAACTG    |
|    |                                           | CS859617 | F | AGGACATTAAACGCCATC    |
|    |                                           |          | R | ATAGGGAATTGGGAACTG    |
| 15 | Lipid transfer family protein (LTP)       | SK007462 | F | ATGGTCTCTGCTCAGT      |
|    |                                           |          | R | CTGGTACGGTTTTTCGAT    |
|    |                                           | CS873225 | F | ATGGTCTCTGCTCAGT      |
|    |                                           |          | R | CTGGTACGGTTTTTCGAT    |
| 16 | Tyrosine aminotransferase 3 (TAT3)        | SK108841 | F | AATACCGTCGCAATGG      |
|    |                                           |          | R | CTTGAACTACCCCTGTAGAT  |
|    |                                           | SK056522 | F | AATACCGTCGCAATGG      |
|    |                                           |          | R | CTTGAACTACCCCTGTAGAT  |
| 17 | Glycoside hydrolase                       | SK063078 | F | GATCGAGTAGTTGGGA      |
|    |                                           |          | R | GCCAAAGGTATTGTCA      |
|    |                                           | CS829656 | F | GGAGTGGAAGTCAGGT      |
|    |                                           |          | R | GTAGGTGCTCGCCAAA      |
| 18 | Cold-responsive protein (COR15B)          | SK085398 | F | TCGTTGATATACGCCG      |
|    |                                           |          | R | CTCTTCTGCTTTACCCTC    |
| 19 | Aspartyl protease family protein          | SK020629 | F | TAGCGCCATGTACTGC      |
|    |                                           |          | R | AGGACTAGATTGGCTG      |
|    |                                           | CS874998 | F | TGCACTACGCCAATGT      |
|    |                                           |          | R | GCTCTAAACCCTCGTCC     |
| 20 | BON association protein 1 (BAP1)          | SK092421 | F | CTGAGATGATGGCGGT      |
|    |                                           |          | R | GCAATTGAAGTAGCAGAAACA |
|    |                                           | SK025560 | F | CTGAGATGATGGCGGT      |
|    |                                           |          | R | GCAATTGAAGTAGCAGAAACA |
| 21 | LRR-kinase                                | SK046987 | F | TGCTGGTACTTACGGC      |
|    |                                           |          | R | AGAAAAGGCAGTGGAG      |
|    |                                           | SK061769 | F | TGAAAGGTGTGGCTCAT     |
|    |                                           |          | R | GCCGTAAGTACCAGCA      |

|                                                       |                                       |          |                       |                  |
|-------------------------------------------------------|---------------------------------------|----------|-----------------------|------------------|
| 22                                                    | Ser/Thr protein kinase family protein | SK034755 | F                     | GTGGCTTCGGTACTGT |
|                                                       |                                       |          | R                     | CGGGTTGACCAGCAGA |
|                                                       |                                       | SK034021 | F                     | GTGGCTTCGGTACTGT |
|                                                       |                                       |          | R                     | CGGGTTGACCAGCAGA |
| Recognition of <i>Peronospora parasitica</i> 4 (RPP4) | SK017569                              | F        | GCATTGAAGTTGCCGAGC    |                  |
|                                                       |                                       | R        | GGGCATCCAGTGAGATTGAGG |                  |

**Supplementary Table 2. Primers used in qPCR characterization of gene expression in T-DNA insertion mutants in Supplementary Fig. 3. SK, Salk line; CS, Sail line.**

|    | Description                                     | Name       | Sequence                                      |
|----|-------------------------------------------------|------------|-----------------------------------------------|
| 1  | LRR-kinase                                      | 1G35710AD1 | CTGGTGCAACGTAGCCGTAGCCTGTGGTCGTAGCATCAGC      |
|    |                                                 | 1G35710pA1 | AATGATACGGCGACCACCGAGATCTTCATCGTGAAGCAAAC     |
| 2  | Calcineurin-like phosphoesterase family protein | 1G13750AD1 | CTGGTAAACCGGGCATGTTCCTGTGGTCGTAGCATCAGC       |
|    |                                                 | 1G13750pA1 | AATGATACGGCGACCACCGAGATTCATGACTCGTCATACACT    |
| 3  | ADR1-like 1 (ADR1-L1)                           | 4G33300AD1 | CAGTATGAATAGAGACAATCCCTGTGGTCGTAGCATCAGC      |
|    |                                                 | 4G33300pA1 | AATGATACGGCGACCACCGAGATTTGCATTTTCATTCTCC      |
| 4  | Aspartic protease 38 (ATASP38)                  | 5G02190AD2 | TGATGATGTCCAATCAGTACCTGTGGTCGTAGCATCAGC       |
|    |                                                 | 5G02190pA2 | AATGATACGGCGACCACCGAGATCGATCCACATGTTCTGTGCTGA |
| 5  | UDP-glucosyl transferase 72E1 (UGT72E1)         | 3G50740AD1 | TGACACGCTCCAAAAGATGCCCTGTGGTCGTAGCATCAGC      |
|    |                                                 | 3G50740pA1 | AATGATACGGCGACCACCGAGATGGCACCACGTGCCATGCACC   |
| 6  | Ankyrin (ANK)                                   | 5G54610AD2 | CTCCTCTACCACGAATACGACCTGTGGTCGTAGCATCAGC      |
|    |                                                 | 5G54610pA2 | AATGATACGGCGACCACCGAGATAAGATGCAATGGTGTGCATAC  |
| 7  | Disease resistance protein-related              | 5G45440AD1 | CTTCTGAATTGGGGTTGTGCGCCTGTGGTCGTAGCATCAGC     |
|    |                                                 | 5G45440pA1 | AATGATACGGCGACCACCGAGATCAGAGGTTTAGTTTTACTCT   |
| 8  | Protein kinase family protein                   | 1G16260AD1 | TTAAAATGGCTGGCCAAGTTCCTGTGGTCGTAGCATCAGC      |
|    |                                                 | 1G16260pA1 | AATGATACGGCGACCACCGAGATTCAGAGCTTAGAGTTCCAC    |
| 9  | ABC transporter family protein                  | 5G52860AD1 | CAACACAGATAAAGTACGACCTGTGGTCGTAGCATCAGC       |
|    |                                                 | 5G52860pA1 | AATGATACGGCGACCACCGAGATCTAAGGAGAGCAAGAAAAACA  |
| 10 | ATPase-like domain-containing protein           | 4G36290AD1 | CGTCTGTTTACTTTCATTCTCCTGTGGTCGTAGCATCAGC      |
|    |                                                 | 4G36290pA1 | AATGATACGGCGACCACCGAGATCTTTTTTCTAAGCTCTTTAC   |
| 11 | Ankyrin repeat family protein                   | 1G10340AD2 | TAGTGGATCCACTTGATATGCCTGTGGTCGTAGCATCAGC      |
|    |                                                 | 1G10340pA2 | AATGATACGGCGACCACCGAGATCAGTATAGTCCCTACGATAC   |
| 12 | Lipase class 3 family protein                   | 3G48080AD1 | CATTCCAAGGTCGTCGAGAGCCTGTGGTCGTAGCATCAGC      |
|    |                                                 | 3G48080pA1 | AATGATACGGCGACCACCGAGATCACTGTCTGGCTCTTGTGCT   |
| 13 | Constitutive shade-avoidance 1 (CSA1)           | 5G17880AD2 | CTCATCGCATCGTTTAAAGCGCCTGTGGTCGTAGCATCAGC     |
|    |                                                 | 5G17880pA2 | AATGATACGGCGACCACCGAGATAAAATCTCAGGAACACAAC    |
| 14 | Cyclic nucleotide gated channel 3 (CNGC3)       | 2G46430AD1 | CTGAACATGTGTGGAGTTGCCTGTGGTCGTAGCATCAGC       |
|    |                                                 | 2G46430pA1 | AATGATACGGCGACCACCGAGATGCCATTGCACTGAATAAAAC   |
| 15 | Lipid transfer family protein (LTP)             | 3G22600AD2 | CGGTATTACAGCGACTGACACCTGTGGTCGTAGCATCAGC      |
|    |                                                 | 3G22600pA2 | AATGATACGGCGACCACCGAGATAGAACCACCACCACCACCAC   |
| 16 | Tyrosine aminotransferase 3 (TAT3)              | 2G24850AD2 | CCATAAATAAGAACAAGATTCTGTGGTCGTAGCATCAGC       |
|    |                                                 | 2G24850pA2 | AATGATACGGCGACCACCGAGATATTGATGTGTCAAGCTTCAA   |
| 17 | Glycoside hydrolase family                      | 3G54440AD2 | CTTCCAACCTTCAATAGTCCCTGTGGTCGTAGCATCAGC       |
|    |                                                 | 3G54440pA2 | AATGATACGGCGACCACCGAGATATAAGGAGAACCTTGAAT     |



|    |                                       |            |                                              |
|----|---------------------------------------|------------|----------------------------------------------|
| 18 | Cold-responsive protein (COR15B)      | 2G42530AD1 | GTGGCTTCGTTGAGGTCATCCCTGTGGTCGTAGCATCAGC     |
|    |                                       | 2G42530pA1 | AATGATACGGCGACCACCGAGATCGAAATCAGAAGCTTCTTT   |
| 19 | Aspartyl protease family protein      | 3G51330AD1 | AATCAGACCGTTTCCAACCCCTGTGGTCGTAGCATCAGC      |
|    |                                       | 3G51330pA1 | AATGATACGGCGACCACCGAGATCAAGCTTTCATCTTCAAAAC  |
| 20 | BON association protein 1 (BAP1)      | 3G61190AD1 | CCCAAACCGGAACCTCCGGTACCTGTGGTCGTAGCATCAGC    |
|    |                                       | 3G61190pA1 | AATGATACGGCGACCACCGAGATAAATTGGCGTTGATACAGAC  |
| 21 | LRR-kinase                            | 4G08850AD1 | CTGGAGCAACATAGCCGTAACCTGTGGTCGTAGCATCAGC     |
|    |                                       | 4G08850pA1 | AATGATACGGCGACCACCGAGATTTTCATCGCATAAGCTAGTT  |
| 22 | Ser/Thr protein kinase family protein | 1G66880AD1 | CTTTTATGTGGAGGAATGATCCTGTGGTCGTAGCATCAGC     |
|    |                                       | 1G66880pA1 | AATGATACGGCGACCACCGAGATGATGTCTCTGTGTATGATTC  |
|    | Ubiquitin 5 (UBQ5)                    | 3G62250AD1 | GAACCTTTCAGATCCATCGCCTGTGGTCGTAGCATCAGC      |
|    |                                       | 3G62250pA1 | AATGATACGGCGACCACCGAGATGCACTCCTCCTCAAACGCT   |
|    | Late elongated hypocotyl (LHY)        | 1G01060AD2 | TTTCGTTGGTAAGGGATACTCCTGTGGTCGTAGCATCAGC     |
|    |                                       | 1G01060pA2 | AATGATACGGCGACCACCGAGATTC AATGTCGCCACTTACCTG |
|    | Circadian clock associated 1 (CCA1)   | 2G46830AD1 | CTCGTCAGACACAGACTTCCCCTGTGGTCGTAGCATCAGC     |
|    |                                       | 2G46830pA1 | AATGATACGGCGACCACCGAGATGCTTGAAGCAATTTCGACC   |

**Supplementary Table 3. Primers used in RASL-seq in Fig. 3c.**
